# Supplementary material
Source: PubMed Central journal article supplement (PMC362121)
Supplement: jcinvest_113_6_856__3.pdf [file jcinvest_113_6_856__3.pdf]

## References for Supplementary Table 1

1. Abbadie, C., Lindia, J.A., Cumiskey, A.M., Peterson, L.B., Mudgett, J.S., Bayne, E.K., DeMartino, J.A., MacIntyre, D.E., and Forrest, M.J. 2003. Impaired neuropathic pain responses in mice lacking the chemokine receptor CCR2. *Proc Natl Acad Sci U S A* 100:7947-7952.
2. Andres, P.G., Beck, P.L., Mizoguchi, E., Mizoguchi, A., Bhan, A.K., Dawson, T., Kuziel, W.A., Maeda, N., MacDermott, R.P., Podolsky, D.K., et al. 2000. Mice with a selective deletion of the CC chemokine receptors 5 or 2 are protected from dextran sodium sulfate-mediated colitis: lack of CC chemokine receptor 5 expression results in a NK1.1+ lymphocyte-associated Th2-type immune response in the intestine. *J Immunol* 164:6303-6312.
3. Bird, J.E., Giancarli, M.R., Kurihara, T., Kowala, M.C., Valentine, M.T., Gitlitz, P.H., Pandya, D.G., French, M.H., and Durham, S.K. 2000. Increased severity of glomerulonephritis in C-C chemokine receptor 2 knockout mice. *Kidney Int* 57:129-136.
4. Blease, K., Mehrad, B., Standiford, T.J., Lukacs, N.W., Gosling, J., Boring, L., Charo, I.F., Kunkel, S.L., and Hogaboam, C.M. 2000. Enhanced pulmonary allergic responses to *Aspergillus* in CCR2<sup>-/-</sup> mice. *J Immunol* 165:2603-2611.
5. Brown, C.R., Blaho, V.A., and Loiacono, C.M. 2003. Susceptibility to experimental Lyme arthritis correlates with KC and monocyte chemoattractant protein-1 production in joints and requires neutrophil recruitment via CXCR2. *J Immunol* 171:893-901.
6. Campbell, E.M., Charo, I.F., Kunkel, S.L., Strieter, R.M., Boring, L., Gosling, J., and Lukacs, N.W. 1999. Monocyte chemoattractant protein-1 mediates cockroach allergen-induced bronchial hyperreactivity in normal but not CCR2<sup>-/-</sup> mice: the role of mast cells. *J Immunol* 163:2160-2167.
7. Dawson, T.C., Kuziel, W.A., Osahar, T.A., and Maeda, N. 1999. Absence of CC chemokine receptor-2 reduces atherosclerosis in apolipoprotein E-deficient mice. *Atherosclerosis* 143:205-211.
8. Dawson, T.C., Beck, M.A., Kuziel, W.A., Henderson, F., and Maeda, N. 2000. Contrasting effects of CCR5 and CCR2 deficiency in the pulmonary inflammatory response to influenza A virus. *Am J Pathol* 156:1951-1959.
9. Egashira, K., Zhao, Q., Kataoka, C., Ohtani, K., Usui, M., Charo, I.F., Nishida, K., Inoue, S., Katoh, M., Ichiki, T., et al. 2002. Importance of monocyte chemoattractant protein-1 pathway in neointimal hyperplasia after periarterial injury in mice and monkeys. *Circ Res* 90:1167-1172.
10. Fife, B.T., Huffnagle, G.B., Kuziel, W.A., and Karpus, W.J. 2000. CC chemokine receptor 2 is critical for induction of experimental autoimmune encephalomyelitis. *J Exp Med* 192:899-905.
11. Gaupp, S., Pitt, D., Kuziel, W.A., Cannella, B., and Raine, C.S. 2003. Experimental autoimmune encephalomyelitis (EAE) in CCR2<sup>-/-</sup> mice: susceptibility in multiple strains. *Am J Pathol* 162:139-150.
12. Izikson, L., Klein, R.S., Charo, I.F., Weiner, H.L., and Luster, A.D. 2000. Resistance to experimental autoimmune encephalomyelitis in mice lacking the CC chemokine receptor (CCR)2. *J Exp Med* 192:1075-1080.
13. Kim, Y., Sung, S., Kuziel, W.A., Feldman, S., Fu, S.M., and Rose, C.E., Jr. 2001. Enhanced airway Th2 response after allergen challenge in mice deficient in CC chemokine receptor-2 (CCR2). *J Immunol* 166:5183-5192.
14. Kurihara, T., Warr, G., Loy, J., and Bravo, R. 1997. Defects in macrophage recruitment and host defense in mice lacking the CCR2 chemokine receptor. *J Exp Med* 186:1757-1762.
15. MacLean, J.A., De Sanctis, G.T., Ackerman, K.G., Drazen, J.M., Sauty, A., DeHaan, E., Green, F.H., Charo, I.F., and Luster, A.D. 2000. CC chemokine receptor-2 is not essential for the development of antigen-induced pulmonary eosinophilia and airway hyperresponsiveness. *J Immunol* 165:6568-6575.
16. Maus, U.A., Waelsch, K., Kuziel, W.A., Delbeck, T., Mack, M., Blackwell, T.S., Christman, J.W., Schlondorff, D., Seeger, W., and Lohmeyer, J. 2003. Monocytes are potent facilitators of alveolar neutrophil emigration during lung inflammation: role of the CCL2-CCR2 axis. *J Immunol* 170:3273-3278.
17. Moore, B.B., Peters-Golden, M., Christensen, P.J., Lama, V., Kuziel, W.A., Paine, R., 3rd, and Toews, G.B. 2003. Alveolar epithelial cell inhibition of fibroblast proliferation is regulated by MCP-1/CCR2 and mediated by PGE2. *Am J Physiol Lung Cell Mol Physiol* 284:L342-349.
18. Peters, W., Scott, H.M., Chambers, H.F., Flynn, J.L., Charo, I.F., and Ernst, J.D. 2001. Chemokine receptor 2 serves an early and essential role in resistance to *Mycobacterium tuberculosis*. *Proc Natl Acad Sci U S A* 98:7958-7963.
19. Rao, A.R., Quinones, M.P., Garavito, E., Kalkonde, Y., Jimenez, F., Gibbons, C., Perez, J., Melby, P., Kuziel, W., Reddick, R.L., et al. 2003. CC chemokine receptor 2 expression in donor cells serves an essential role in graft-versus-host-disease. *J Immunol* 171:4875-4885.
20. Sato, N., Kuziel, W.A., Melby, P.C., Reddick, R.L., Kostecki, V., Zhao, W., Maeda, N., Ahuja, S.K., and Ahuja, S.S. 1999. Defects in the generation of IFN-gamma are overcome to control infection with *Leishmania donovani* in CC chemokine receptor (CCR) 5<sup>-</sup>, macrophage inflammatory protein-1 alpha<sup>-</sup>, or CCR2-deficient mice. *J Immunol* 163:5519-5525.
21. Sato, N., Ahuja, S.K., Quinones, M., Kostecki, V., Reddick, R.L., Melby, P.C., Kuziel, W.A., and Ahuja, S.S. 2000. CC chemokine receptor (CCR)2 is required for langerhans cell migration and localization of T helper cell type 1 (Th1)-inducing dendritic cells. Absence of CCR2 shifts the *Leishmania* major-resistant phenotype to a susceptible state dominated by Th2 cytokines, b cell outgrowth, and sustained neutrophilic inflammation. *J Exp Med* 192:205-218.
22. Scott, H.M., and Flynn, J.L. 2002. *Mycobacterium tuberculosis* in chemokine receptor 2-deficient mice: influence of dose on disease progression. *Infect Immun* 70:5946-5954.
23. Solomon, M.F., Kuziel, W.A., Mann, D.A., and Simeonovic, C.J. 2003. The role of chemokines and their receptors in the rejection of pig islet tissue xenografts. *Xenotransplantation* 10:164-177.
24. Traynor, T.R., Kuziel, W.A., Toews, G.B., and Huffnagle, G.B. 2000. CCR2 expression determines T1 versus T2 polarization during pulmonary *Cryptococcus neoformans* infection. *J Immunol* 164:2021-2027.

## References for Supplementary Table 1 (*continued*)

25. Zhu, Z., Ma, B., Zheng, T., Homer, R.J., Lee, C.G., Charo, I.F., Noble, P., and Elias, J.A. 2002. IL-13-induced chemokine responses in the lung: role of CCR2 in the pathogenesis of IL-13-induced inflammation and remodeling. *J Immunol* 168:2953-2962.
