# Supplementary material
Source: PubMed Central journal article supplement (PMC362121)
Supplement: jcinvest_113_6_856__7.pdf [file jcinvest_113_6_856__7.pdf]

Supplementary Table 4

Increased levels of *L. major*-specific Ab (OD)\* in Balb/c *ccr2*<sup>-/-</sup> mice

|       | +/+ (n = 3)   | <i>ccr2</i> <sup>-/-</sup> (n = 3) | <i>P</i> |
|-------|---------------|------------------------------------|----------|
| IgG1  | 0.201 ± 0.076 | 0.840 ± 0.162                      | 0.0001   |
| IgG2a | 0.031 ± 0.021 | 0.193 ± 0.052                      | 0.0002   |

6 weeks after *Leishmania major* infection, serum was collected from the indicated mice. *Leishmania major*-major specific antibody levels were determined as described previously (Sato N. *et al*, J. Exp. Med 2000, 192: 205-18). \*OD, optical density
